# Supplementary material for: Oak Species Quercus robur L. and Quercus petraea Liebl. Identification Based on UHPLC-HRMS/MS Molecular Networks
Source: MDPI journal article supplement (doi:10.3390/metabo11100684), 2021-10-06

## Supplementary data

### Species assignments according to the DNA analyses

Qro: *Quercus robur* (pedunculate oak), Qpe: *Quercus petraea* (sessile oak), Qpy: *Quercus pyrenaica* (tauzin oak), Qpub: *Quercus pubescens* (pubescent oak)

#### ➤ Table S1: Composition of sessile pooled extract

| Location                                | Pedunculate<br>Qro | Tauzin<br>Qpy | Pubescent<br>Qpub | Sessile<br>Qpe | Species |
|-----------------------------------------|--------------------|---------------|-------------------|----------------|---------|
| Aboncourt                               | 0.004              | 0.002         | 0.006             | 0.987          | Qpe     |
| Amboise                                 | 0.009              | 0.010         | 0.004             | 0.978          | Qpe     |
| Polisy                                  | 0.005              | 0.004         | 0.007             | 0.985          | Qpe     |
| Sully la chapelle                       | 0.003              | 0.003         | 0.007             | 0.988          | Qpe     |
| Aboncourt                               | 0.146              | 0.010         | 0.011             | 0.834          | Qpe     |
| Fontainebleau                           | 0.004              | 0.005         | 0.139             | 0.852          | Qpe     |
| Dainville-Berthelévill                  | 0.051              | 0.005         | 0.010             | 0.933          | Qpe     |
| Saint Désiré and Saint Eloy<br>d'Allier | 0.004              | 0.002         | 0.018             | 0.976          | Qpe     |
| Igé                                     | 0.095              | 0.002         | 0.042             | 0.862          | Qpe     |
| Azé                                     | 0.008              | 0.007         | 0.005             | 0.979          | Qpe     |
| Blois                                   | 0.004              | 0.003         | 0.003             | 0.989          | Qpe     |
| Compiègne                               | 0.004              | 0.020         | 0.006             | 0.971          | Qpe     |
| Asnières sous bois                      | 0.005              | 0.003         | 0.005             | 0.988          | Qpe     |
| Villedieu sur Indre                     | 0.003              | 0.024         | 0.012             | 0.960          | Qpe     |
| Etréchy                                 | 0.003              | 0.002         | 0.003             | 0.992          | Qpe     |
| Cellettes                               | 0.004              | 0.006         | 0.006             | 0.983          | Qpe     |
| Le Moulinet sur solin                   | 0.004              | 0.008         | 0.004             | 0.984          | Qpe     |
| Ingrannes                               | 0.002              | 0.002         | 0.005             | 0.990          | Qpe     |
| Chalette sur loing                      | 0.092              | 0.016         | 0.036             | 0.856          | Qpe     |
| Chevillon sur Huillard                  | 0.012              | 0.012         | 0.011             | 0.965          | Qpe     |
| Poinçonnet                              | 0.004              | 0.003         | 0.003             | 0.99           | Qpe     |

➤ *Table S2: Composition of pedunculate pooled extract*

| Location                | Pedunculate<br>Qro | Tauzin<br>Qpy | Pubescent<br>Qpub | Sessile<br>Qpe | Species |
|-------------------------|--------------------|---------------|-------------------|----------------|---------|
| Sully la chapelle       | 0.987              | 0.007         | 0.005             | 0.978          | Qro     |
| Bride                   | 0.992              | 0.003         | 0.003             | 0.003          | Qro     |
| Bride                   | 0.973              | 0.019         | 0.003             | 0.005          | Qro     |
| Dainville-Bertheléville | 0.983              | 0.003         | 0.007             | 0.006          | Qro     |
| Igé                     | 0.988              | 0.006         | 0.003             | 0.003          | Qro     |
| Azé                     | 0.889              | 0.063         | 0.028             | 0.019          | Qro     |
| Compiègne               | 0.984              | 0.005         | 0.005             | 0.006          | Qro     |
| Villedieu sur Indre     | 0.989              | 0.004         | 0.004             | 0.002          | Qro     |
| Azé                     | 0.989              | 0.005         | 0.003             | 0.003          | Qro     |
| Sully la chapelle       | 0.986              | 0.003         | 0.006             | 0.005          | Qro     |
| Polisy                  | 0.866              | 0.056         | 0.046             | 0.031          | Qro     |
| Compiègne               | 0.933              | 0.015         | 0.029             | 0.023          | Qro     |
| Villedieu sur Indre     | 0.990              | 0.003         | 0.004             | 0.003          | Qro     |
| Azé                     | 0.980              | 0.008         | 0.007             | 0.005          | Qro     |
| Etréchy                 | 0.971              | 0.005         | 0.010             | 0.014          | Qro     |
| Arthon                  | 0.942              | 0.041         | 0.011             | 0.005          | Qro     |
| Chevillon sur Huillard  | 0.958              | 0.008         | 0.021             | 0.013          | Qro     |
| Chevillon sur Huillard  | 0.989              | 0.005         | 0.004             | 0.003          | Qro     |
| Arthon                  | 0.896              | 0.011         | 0.007             | 0.086          | Qro     |
| Chevillon sur Huillard  | 0.993              | 0.003         | 0.002             | 0.002          | Qro     |
| Poinçonnet              | 0.95               | 0.024         | 0.018             | 0.008          | Qro     |

➤ *Table S3: Listing of individual samples*

| Location                  | Pedunculate<br>Qro | Tauzin<br>Qpy | Pubescent<br>Qpub | Sessile<br>Qpe | Species |
|---------------------------|--------------------|---------------|-------------------|----------------|---------|
| Aboncourt                 | 0.003              | 0.003         | 0.004             | 0.991          | Qpe     |
| Orléans -Massif ingrannes | 0.002              | 0.002         | 0.005             | 0.990          | Qpe     |
| Forêt des abbayes         | 0.003              | 0.002         | 0.003             | 0.992          | Qpe     |
| Forêt d'Orléans           | 0.004              | 0.008         | 0.004             | 0.984          | Qpe     |
| Rusy                      | 0.003              | 0.004         | 0.004             | 0.989          | Qpe     |
| Chateauroux               | 0.981              | 0.004         | 0.006             | 0.010          | Qro     |
| Forêt des abbayes         | 0.970              | 0.005         | 0.010             | 0.014          | Qro     |
| Sully la chapelle         | 0.988              | 0.004         | 0.004             | 0.004          | Qro     |
| Chateauroux               | 0.988              | 0.003         | 0.005             | 0.004          | Qro     |
| Lisledon                  | 0.993              | 0.003         | 0.002             | 0.002          | Qro     |

## Description of the characteristic fragments used to annotate the molecular network

➤ *Figure S1: Representative MS/MS spectrum of each cluster*

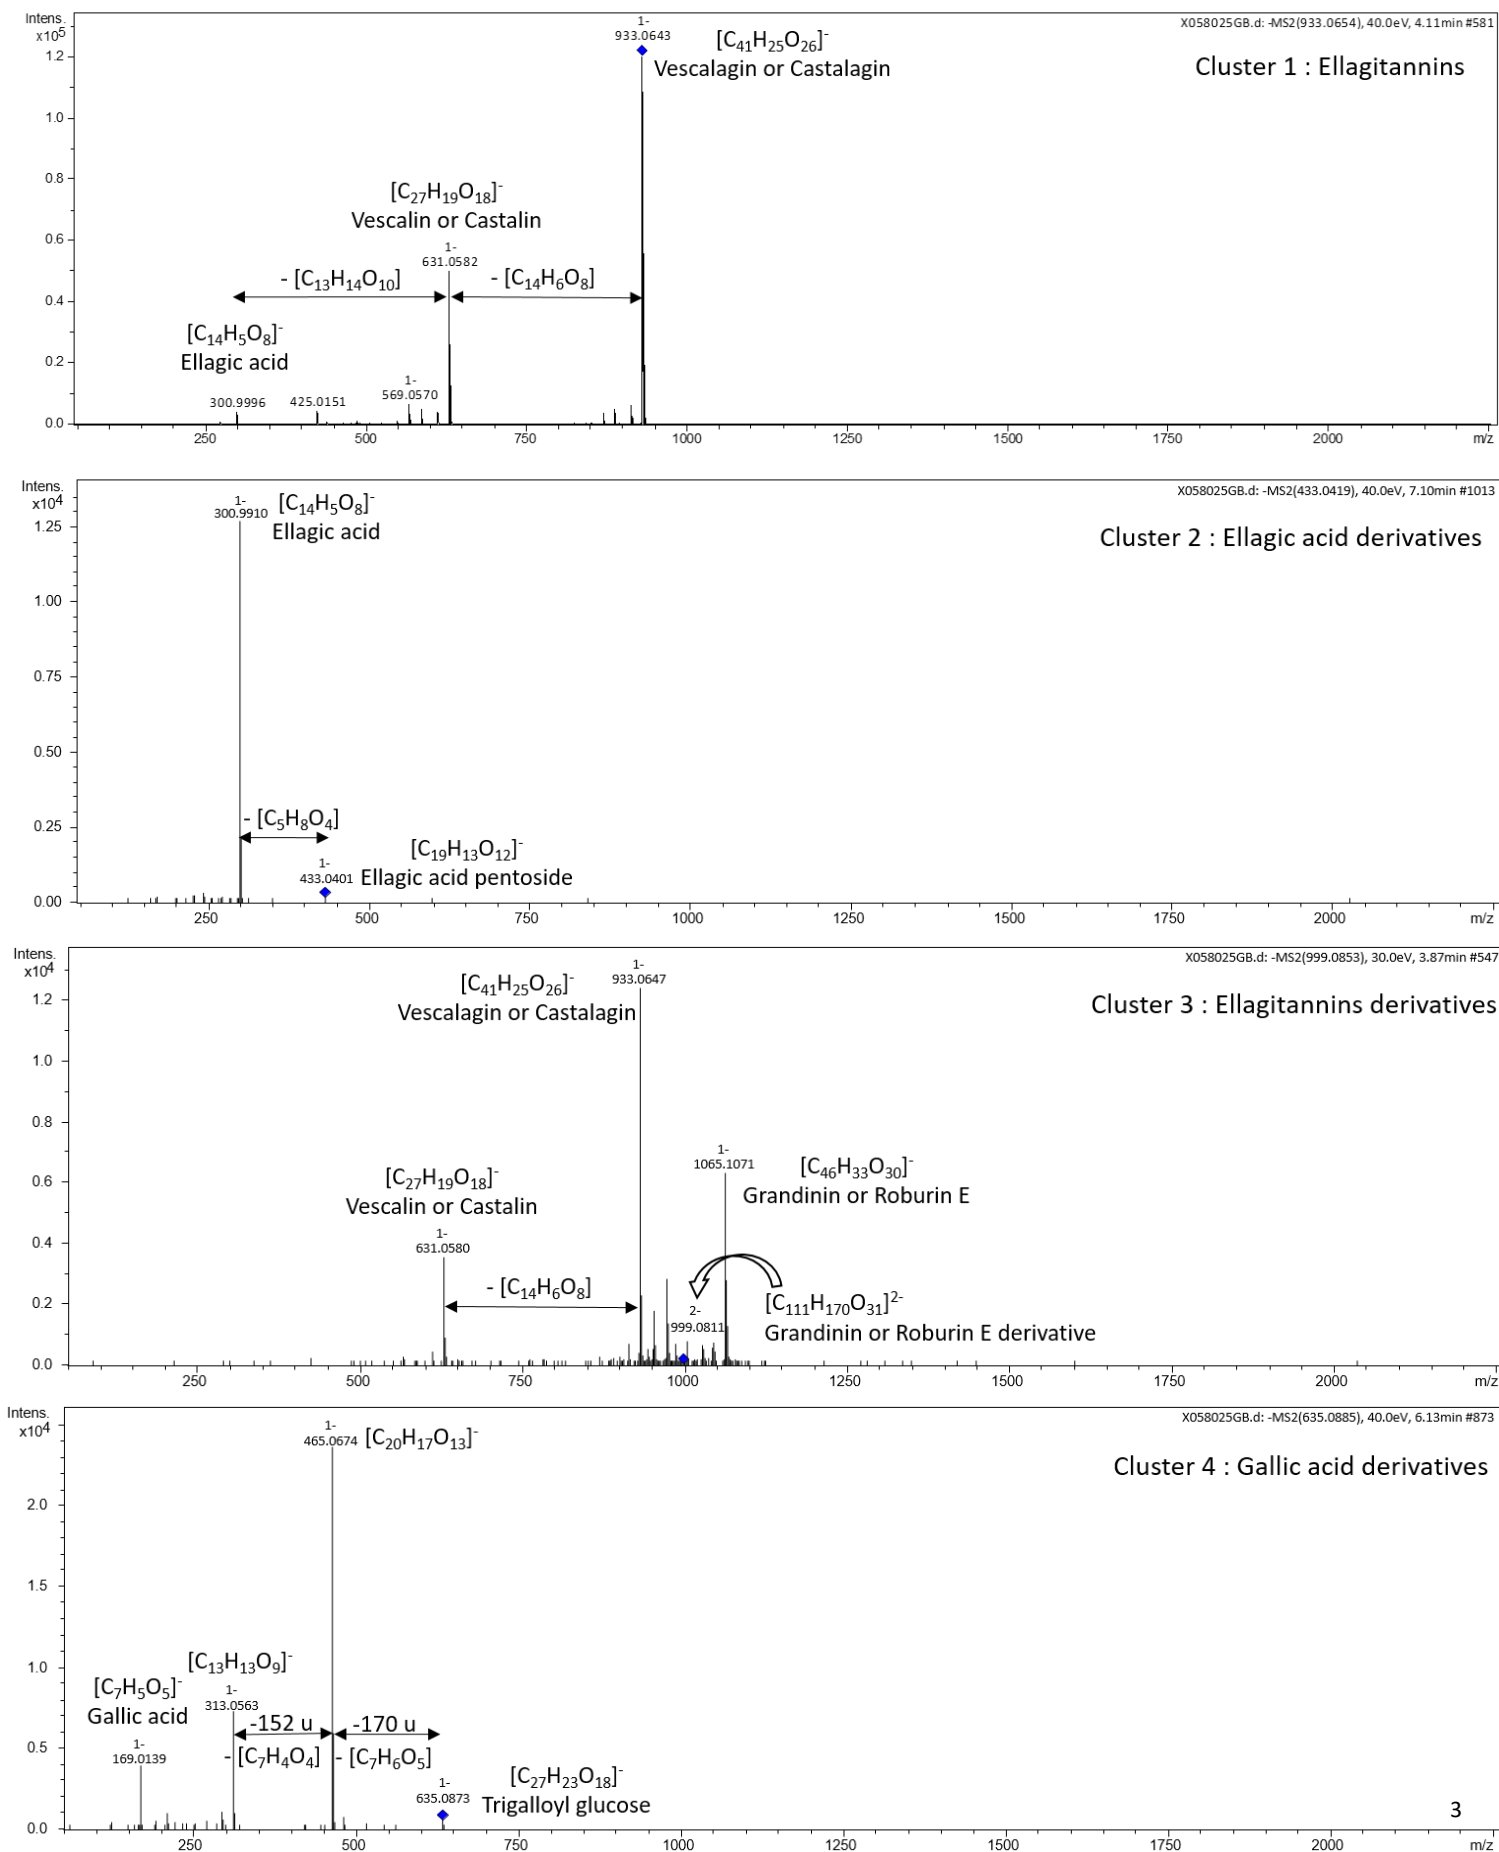

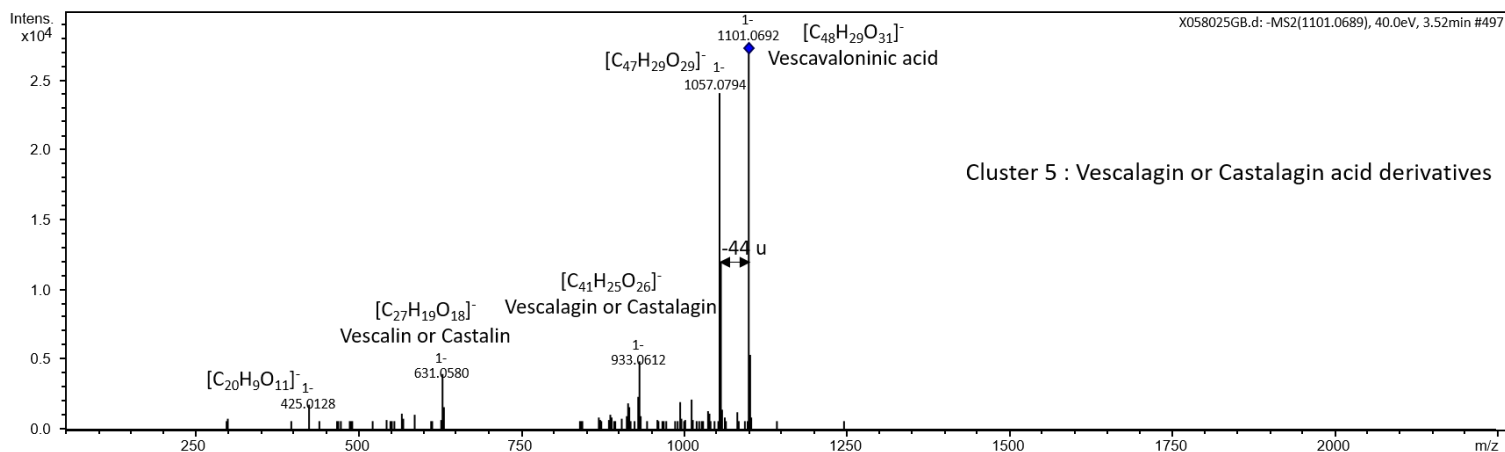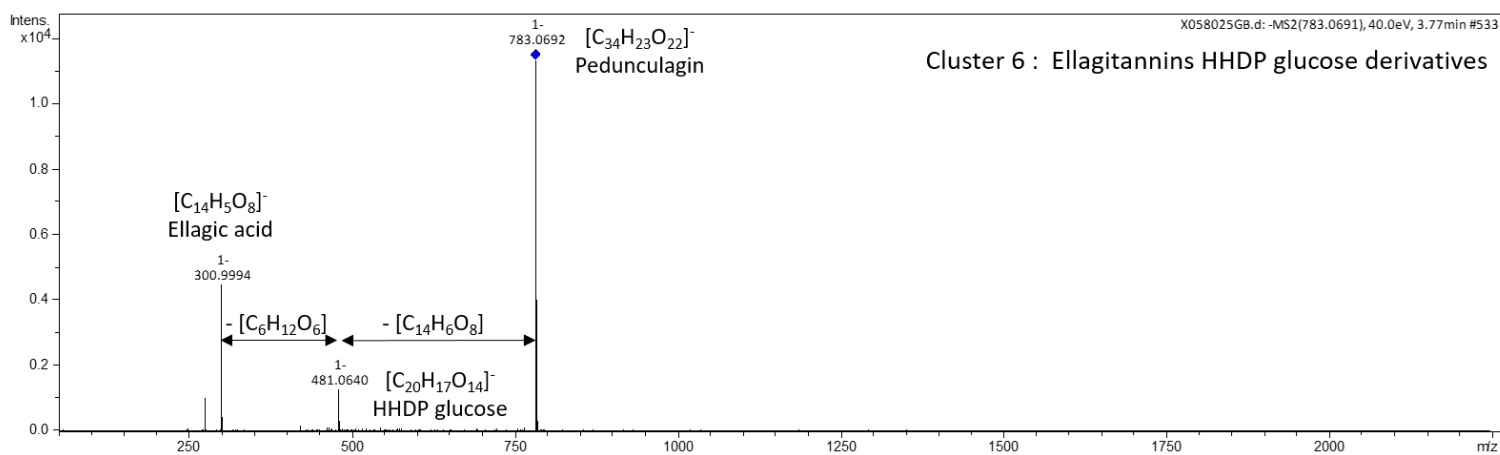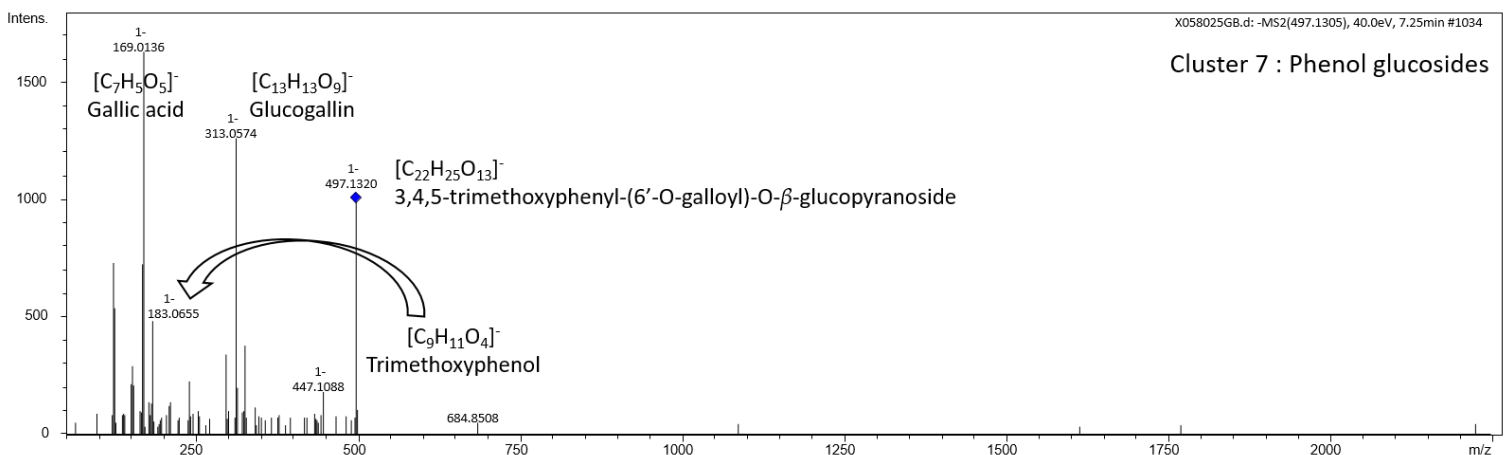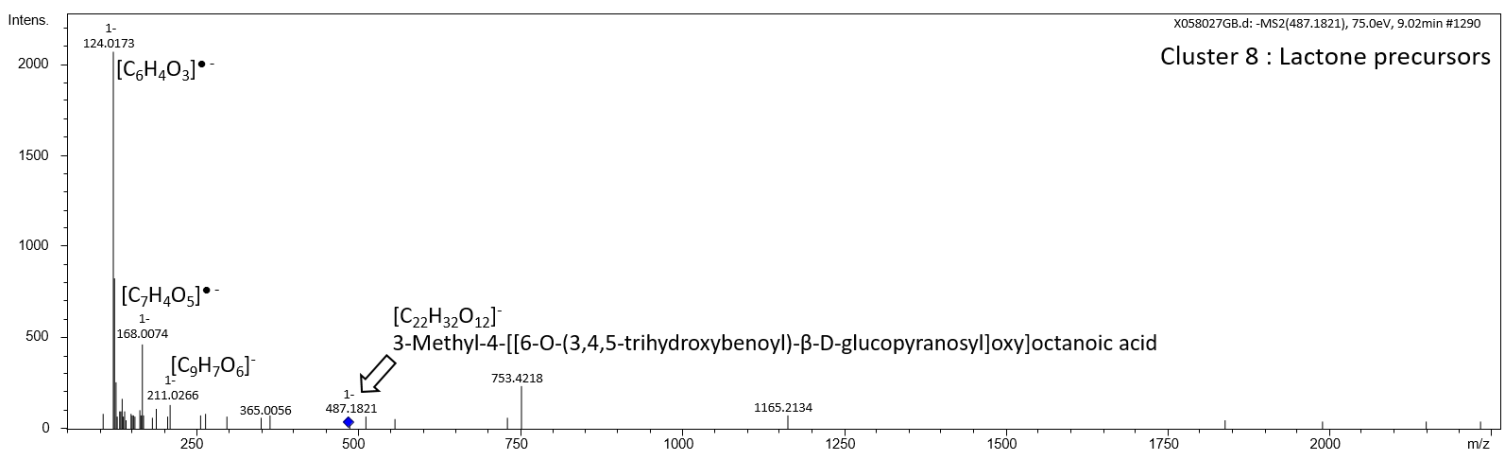

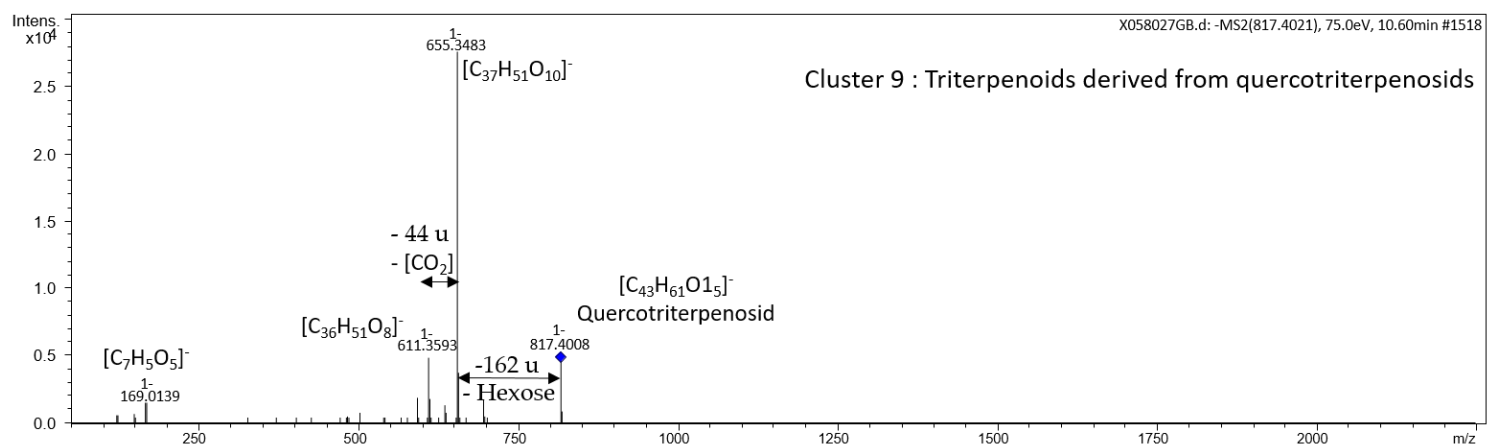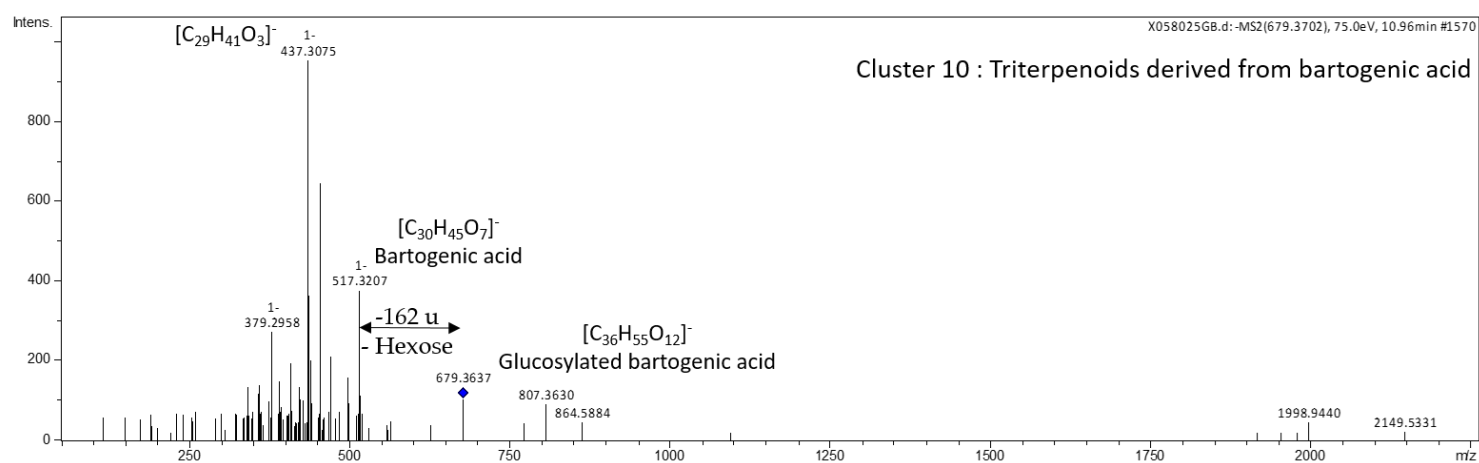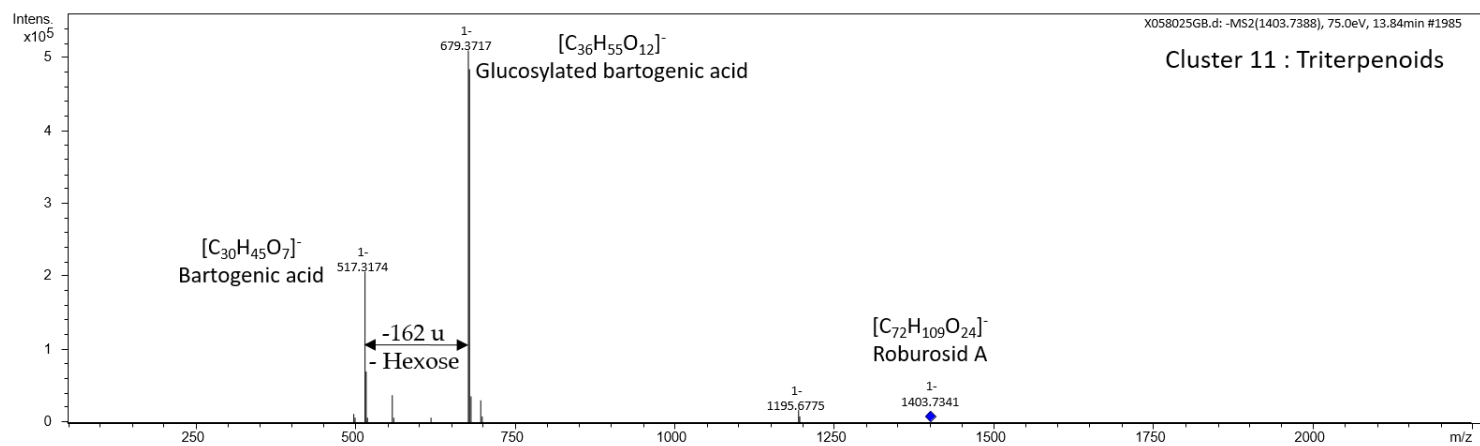

Supplement: s1 [file s1]
